# Supplementary material for: An Efficient Markerless Deletion System Suitable for the Industrial Strains of Streptomyces
Source: PubMed Central journal article supplement (PMC9705919; doi:10.4014/jmb.2106.06083), 2021-09-04
Supplement: jmb-31-12-1722-supple.pdf [file jmb-31-12-1722-supple.pdf]

**An efficient markerless deletion system suitable for the industrial strains of**  
***Streptomyces***

Jianxin Dong<sup>1</sup>, Jiaxiu Wei<sup>1</sup>, Han Li<sup>1</sup>, Shiyao Zhao<sup>1</sup>, Wenjun Guan<sup>1\*</sup>

<sup>1</sup> Institute of Pharmaceutical Biotechnology and The Children's Hospital, Zhejiang University School of Medicine, Hangzhou,

China

\*Corresponding author: [guanwj@zju.edu.cn](mailto:guanwj@zju.edu.cn)

Tel: +86-0571-88206477

## Supplementary materials

**Table S1 Primers used in this study**

| Name               | Sequence (5'-3')                                 |
|--------------------|--------------------------------------------------|
| <i>SaindC</i> -F   | ATGAGCACCAGCACGCCGCC                             |
| <i>SaindC</i> -R   | CTAGGCGAAGAGGTCCAAGG                             |
| <i>SaindC</i> -F-2 | GTGCAGGACTGGGGGAGTTATGAGCACCAGCACGCCGCC          |
| <i>SaindC</i> -R-2 | aagctTGAATTcCTAGGCGAAGAGGTCCAAGG                 |
| kas-F              | gagggcgcgaagcttTGTTACATTTCGAACGGTCT              |
| kas-R              | CGTGCAGGACTGGGGGAGTT                             |
| azo-up-F           | gacctcttcgcctaggaattcGCGCCTGTCTGAGCGTAACT        |
| azo-up-R           | tttcccagaaggcctgtacgAGTGCCGCCAGACCAACTA          |
| azo-down-F         | CTGGCCGGCACTCGTACAGGCCTTCTGGGAAA                 |
| azo-down-R         | agaccatggggtaccatgatGGCCTTGCGATGGATATCCC         |
| $\Delta$ azo-out-F | CGGAGGTGAGGCGTCAGTGT                             |
| $\Delta$ azo-out-R | TCCTCCCACCAGAGCAGGCT                             |
| dnr-up-F           | taggaattcaagcttggatccAGATCCTGCTCACCCGTGTCT       |
| dnr-up-R           | tcategtcatACCATCCGAGTCGTGATTGCT                  |
| dnr-down-F         | ctcggatggtATGACGATGACCGAGTTCCCCTT                |
| dnr-down-R         | agaccatggggtaccatgatCGCTGAGCAAACCCAGTAGCC        |
| $\Delta$ dnr-out-F | CCCTCCCGCTCGTGCCTGT                              |
| $\Delta$ dnr-out-R | AGGTTGCCAAGACCCTCCGTTC                           |
| sal-up-F           | agaccatggggtaccatgatGCTCCCGCTGGAACGGGTAG         |
| sal-up-R           | acatggacggcatgctcgacGTTTAAACCCACGAGGACCCGGTCGTCA |
| sal-down-F         | GTCGAGCATGCCGTCCATGT                             |
| sal-down-R         | ttcaagcttggatccgatatcGGGCTGCGCGGACACCTGAC        |
| $\Delta$ sal-out-F | AGCACCTCGTGGCCCAACTCG                            |
| $\Delta$ sal-out-R | CTGCGCGTCAGCCATGCCTT                             |

|                     |                      |
|---------------------|----------------------|
| $\Delta$ 200k-out-F | CGCCGGGTGAACGAGGACAG |
| $\Delta$ 200k-out-R | ACGTGGTGGAGCAGGGCTAC |

Up-F and up-R are primers for constructing the upstream fragment of the target gene, and down-F and down-R for constructing the downstream fragment. Out-F and out-R were used for the verification of the deletion of the target genes

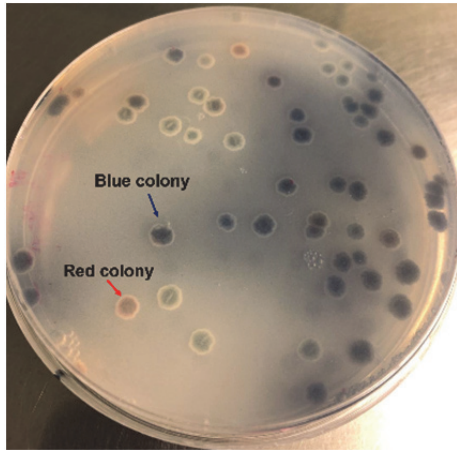

**Figure S1.** The indigoidine production of doxorubicin-producing *S. coeruleorubidus* strain. The red colonies are the wild-type *S. coeruleorubidus* without indigoidine produced, the blue colonies are the mutants producing indigoidine.
